# Supplementary material for: Novel formation of Au/Ag bimetallic nanoparticles from a mixture of monometallic nanoparticles and their application for the rapid detection of lead in onion samples
Source: Royal Society of Chemistry journal article supplement (doi:10.1039/d0nj02994g), 2020-01-01
Supplement: d0nj02994g1.pdf [file d0nj02994g1.pdf]

**SUPPLEMENTRY MATERIALS:**

**Fig. S(1).** UV-Vis spectra to optimize effect of time interval with 10 min of reaction time for selective determination of  $\text{Pb}^{2+}$  ion using Au/Ag BNPs.

**Fig. S(2).** UV-Vis spectra to optimize effect of concentration of  $\text{Pb}^{2+}$  from 10-100  $\text{ng mL}^{-1}$  for selective determination of  $\text{Pb}^{2+}$  ion using Au/Ag BNPs.

**Fig. S(3).** UV-Vis spectra to optimize effect of pH ranging from 3-10, for selective determination of  $\text{Pb}^{2+}$  ion using Au/Ag BNPs.

**Fig. S(4).** UV-Vis spectra to optimize effect of chemical substances for selective determination of  $\text{Pb}^{2+}$  ion using Au/Ag BNPs.

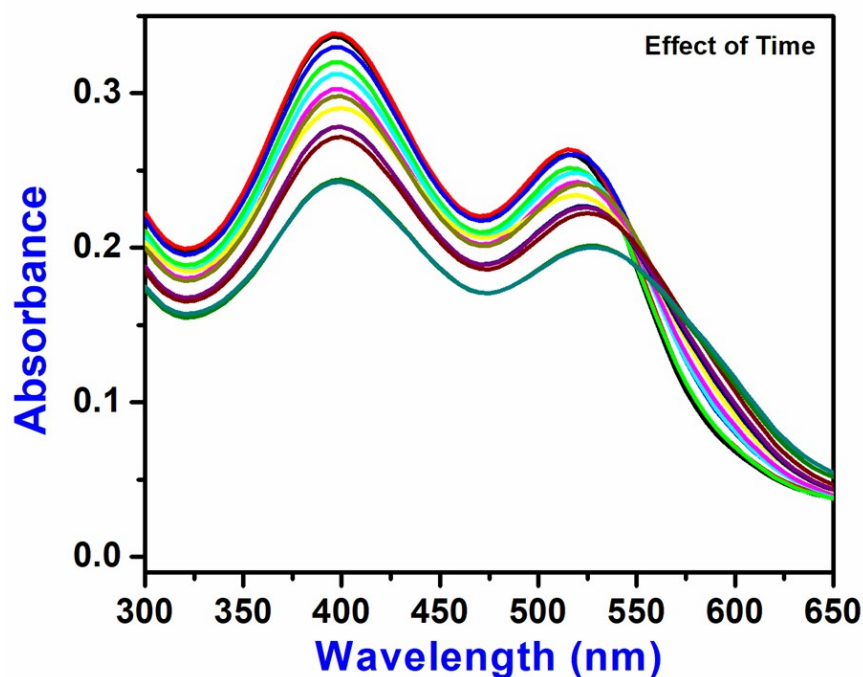

**Fig. S(1).** UV-Vis spectra to optimize effect of time interval with 10 min of reaction time for selective determination of  $\text{Pb}^{2+}$  ion using Au/Ag BNPs.

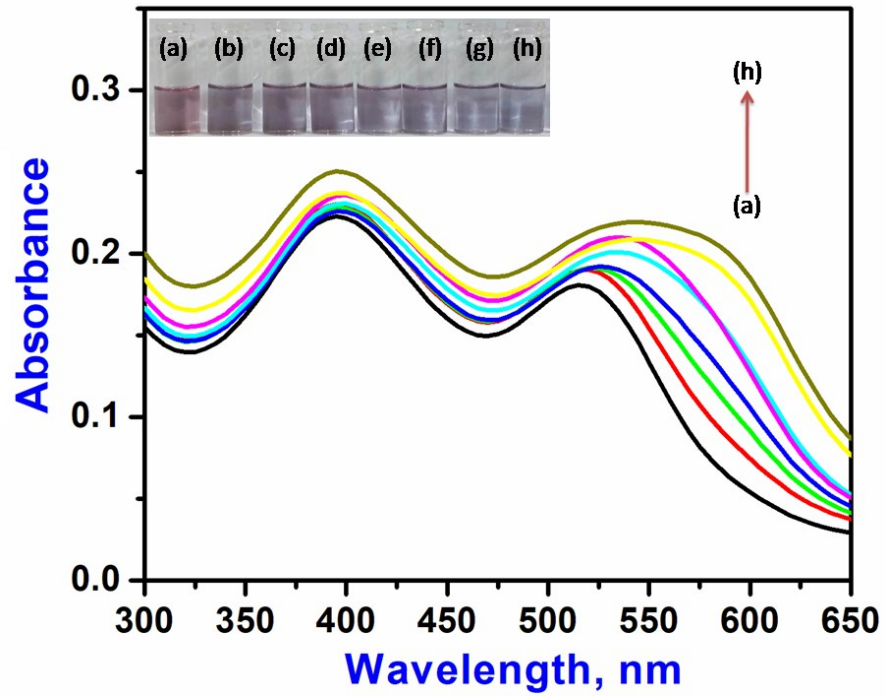

**Fig. S(2).** UV-Vis spectra to optimize effect of concentration of Pb<sup>2+</sup> from 10-100 ng mL<sup>-1</sup> for selective determination of Pb<sup>2+</sup> ion using Au/Ag BNPs.

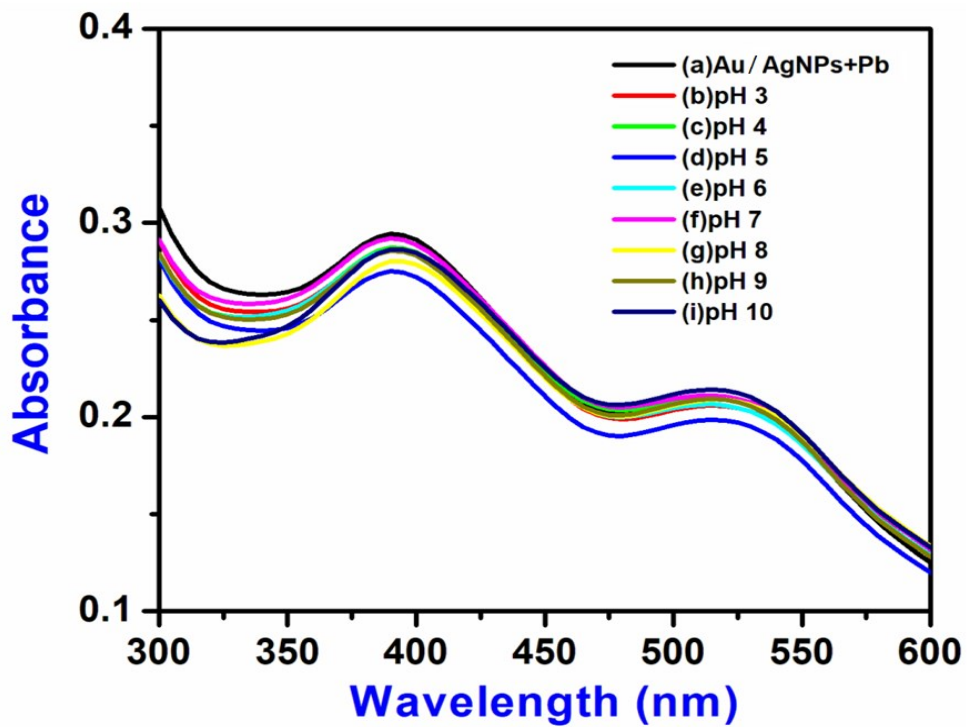

**Fig. S(3).** UV-Vis spectra to optimize effect of pH ranging from 3-10, for selective determination of  $\text{Pb}^{2+}$  ion using Au/Ag BNPs.

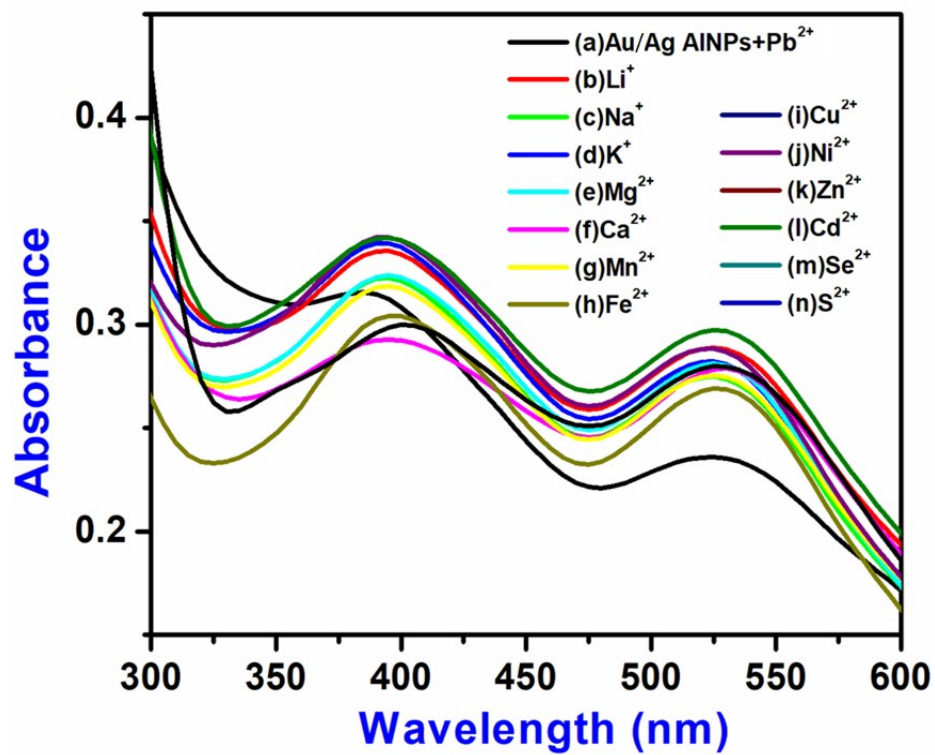

**Fig. S(4).** UV-Vis spectra to optimize effect of chemical substances for selective determination of Pb<sup>2+</sup> ion using Au/Ag BNPs.
